# Supplementary material for: Practical “1-2-3-4-Day” Rule for Starting Direct Oral Anticoagulants After Ischemic Stroke With Atrial Fibrillation: Combined Hospital-Based Cohort Study
Source: PubMed Central journal article supplement — Stroke. 2022 Feb 2;53(5):1540–9. doi: 10.1161/STROKEAHA.121.036695 (PMC9022681; doi:10.1161/strokeaha.121.036695), 2022-02-02

## **Online Supplement**

### **The practical “1-2-3-4-day” rule for starting direct oral anticoagulants after ischemic stroke with atrial fibrillation**

**Authors:** Shunsuke Kimura, et al, for the SAMURAI, RELAXED, RAF, RAF-NOAC, CROMIS-2, NOACISP LONGTERM, Erlangen registry and Verona registry Investigators

#### **Contents:**

Table I. List for the Study Investigators

Table II. Inclusion and exclusion criteria for the included studies

Table III. Baseline characteristics of patients in each subgroup of the derivation cohort by stroke severity

Table IV. Outcomes in four subgroups of the derivation cohort by stroke severity

Table V. Baseline characteristics of patients in the validation cohort

Table VI. Outcomes in four subgroups of the validation cohort by stroke severity

Figure I. Scatter plots of age and the National Institutes of Health Stroke Scale scores

## **Table I. List for the Study Investigators**

### **[Derivation]**

#### **A. SAMURAI Study Investigators**

**Principal investigator:** Kazunori Toyoda, MD (National Cerebral and Cardiovascular Center: NCVC)

**Investigators and Institutions:** Kenichi Todo, MD (Kobe City Medical Center General Hospital); Kazumi Kimura, MD; Yoshiki Yagita, MD (Kawasaki Medical School); Eisuke Furui, MD; Ryo Itabashi, MD (Kohnan Hospital); Tadashi Terasaki, MD (Japanese Red Cross Kumamoto Hospital); Yoshiaki Shiokawa, MD; Teruyuki Hirano, MD (Kyorin University School of Medicine); Kenji Kamiyama, MD; Jyoji Nakagawara, MD (Nakamura Memorial Hospital); Shunya Takizawa, MD; Kazunari Homma, MD (Tokai University School of Medicine); Satoshi Okuda, MD (NHO Nagoya Medical Center); Yasushi Okada, MD; Keisuke Tokunaga, MD (NHO Kyushu Medical Center); Tomoaki Kameda, MD; Kazuomi Kario, MD (Jichi Medical University School of Medicine); Yoshinari Nagakane, MD (Kyoto Second Red Cross Hospital); Yasuhiro Hasegawa, MD; Hisanao Akiyama, MD (St Marianna University School of Medicine); Satoshi Shibuya, MD; Hiroshi Mochizuki, MD (South Miyagi Medical Center); Yasuhiro Ito, MD (TOYOTA Memorial Hospital); Takahiro Nakashima, MD; Hideki Matsuoka, MD (NHO Kagoshima Medical Center); Kazuhiro Takamatsu, MD (Ohta Memorial Hospital); Kazutoshi Nishiyama, MD (Kitasato University School of Medicine); Masatoshi Koga, MD (NCVC)

**Central Office:** Sohei Yoshimura, MD; Shoichiro Sato, MD; Shoji Arihiro, MD; Masatoshi Koga, MD; Hiroshi Yamagami, MD; Manabu Inoue, MD; Masahito Takagi, MD; Kanta Tanaka, MD; Masayuki Shiozawa, MD; Takeshi Yoshimoto, MD; Tetsuya Chiba, MD; Shunsuke Kimura, MD (NCVC)

**Supervisory Advisor:** Kazuo Minematsu, MD; Kazuyuki Nagatsuka, MD (NCVC)

#### **B. RELAXED Study Investigators**

**Principal investigator:** Kazuo Minematsu, MD

**Supervisor:** Takenori Yamaguchi, MD

**Protocol committee:** Masahiro Yasaka, MD (Chair); Kazunori Toyoda, MD (Vice-chair); Takehiko Nagao, MD; Hiroshi Yamagami, MD; Shinichi Yoshimura, MD

**Steering committee:** Yasuhiro Hasegawa, MD; Yoichiro Hashimoto, MD; Kiyohiro Houkin, MD; Kazumi Kimura, MD; Kazuo Kitagawa, MD; Masayasu Matsumoto, MD; Yasushi Okada, MD; Satoshi Okuda, MD; Norio Tanahashi, MD; Yasuo Terayama, MD; Shinichiro Uchiyama, MD

**Clinical Events Committee:** Etsuro Mori, MD (Chair); Yutaka Furukawa, MD; Takeshi Kimura, MD; Yoshiaki Kumon, MD; Ken Nagata, MD; Shigeru Nogawa, MD; Tomohiro Sakamoto, MD

**MRI Imaging Evaluation Committee:** Teruyuki Hirano, MD (Chair); Toshinori Hirai, MD; Kohsuke Kudo, MD; Makoto Sasaki, MD

**Data Monitoring Committee:** Shotai Kobayashi, MD

**Statistical Analysis:** Toshimitsu Hamasaki, PhD

### **[Validation]**

#### **C. RAF and RAF-NOAC**

Michela Giustozzi MD, Monica Acciarresi MD, Giancarlo Agnelli MD, Valeria Caso MD, PhD, Fabio Bandini MD, Georgios Tsivgoulis MD, Shadi Yaghi MD, Karen L. Furie MD, Prasanna Tadi MD, Cecilia Becattini MD, Marialuisa Zedde MD, Azmil H Abdul-Rahim MD, Kennedy R Lees MD, Andrea Alberti MD, Michele Venti MD, PhD, Cataldo D’Amore MD, Maria Giulia Mosconi MD, Ludovica Anna Cimini MD, Paolo Bovi MD, Monica Carletti MD, Alberto Rigatelli MD, Manuel Cappellari MD, Jukka Putaala MD, Liisa Tomppo MD, Turgut Tatlisumak MD, Simona Marcheselli MD, Alessandro Pezzini MD, Loris Poli MD, Alessandro Padovani MD, PhD, Vieri Vannucchi MD, Sung-II Sohn MD, PhD, Gianni Lorenzini MD, Rossana Tassi MD, Francesca Guideri MD, Maurizio Acampa MD, Giuseppe Martini MD, George Ntaios MD, George Athanasakis MD, Konstantinos Makaritsis MD, Efstathia Karagkiozi MD, Konstantinos Vadikolias MD, Chrissoula Liantinioti MD, Maria Chondrogianni MD, Nicola Mumoli MD, Franco Galati MD, Simona Sacco MD, Cindy Tiseo MD, Francesco Corea MD, PhD, Walter Ageno MD, Marta Bellesini MD, Giovanna Colombo MD, Giorgio Silvestrelli MD, PhD, Alfonso Ciccone MD, Alessia Lanari MD, Umberto Scoditti MD, Licia Denti MD, Michelangelo Mancuso MD, Miriam Maccarrone MD, Leonardo Ulivi MD, Giovanni Orlandi MD, Nicola Giannini MD, Tiziana Tassinari MD, Maria Luisa De Lodovici MD, Christina Rueckert MD, Antonio Baldi MD, Danilo Toni MD, PhD, Federica Letteri MD, Martina Giuntini MD, Enrico Maria Lotti MD, Yuriy Flomin MD, Alessio Pieroni MD, Odysseas Kargiotis MD, Theodore Karapanayiotides MD, PhD, Serena Monaco MD, Mario Maimone Baronello MD, Laszo Csiba MD, Lilla Szabo MD, Alberto Chiti MD, Elisa Giorli MD, Massimo Del Sette MD, Davide Imberti MD, Dorjan Zabzuni MD, Boris Doronin MD, Vera Volodina MD, Patrik Michel, PD-MER, Peter Vanacker MD, Kristian Barlinn MD, Lars-Peder Pallesen MD, Jessica Barlinn MD, Dirk Deleu, MD, PhD, Gayane Melikyan MD, Faisal Ibrahim MD, Naveed Akhtar MD, Vanessa Gourbali MD, Luca Masotti MD

#### **D. CROMIS-2**

Adrian Parry-Jones, MD; Chris Patterson, MD; Christopher Price, MD; Abduelbaset Elmarimi, MD; Anthea Parry, MD; Arumug Nallasivam, MD; Azlisham Mohd Nor, MD; Bernard Esis, MD; David

Bruce; Christine Roffe, MD; Clare Holmes, MD; David Cohen, MD; David Hargroves, MD; David Mangion, MD; Dinesh Chadha, MD; Djamil Vahidassr, MD; Dulka Manawadu, MD; Elio Giallombardo, MD; Elizabeth Warburton, MD; Enrico Flossman, MD; Gunaratam Gunathilagan, MD; Harald Proschel, MD; Hedley Emsley, MD; Ijaz Anwar, MD; James Okwera, MD; Janet Putterill, MD; Janice O’Connell, MD; John Bamford, MD; John Corrigan, MD; Jon Scott; Jonathan Birns, MD; Karen Kee, MD; Kari Saastamoinen, MD; Kath Pasco, MD; Krishna Dani, MD; Lakshmanan Sekaran, MD; Lillian Choy, MD; Liz Iveson, MD; Maam Mamun, MD; Mahmud Sajid, MD; Martin Cooper, MD; Matthew Burn, MD; Matthew Smith, MD; Michael Power, MD; Michelle Davis, MD; Nigel Smyth, MD; Roland Veltkamp, MD; Pankaj Sharma, MD; Paul Guyler, MD; Paul O’Mahony, MD; Peter Wilkinson, MD; Prabel Datta, MD; Prasanna Aghoram, MD; Rachel Marsh, MD; Robert Luder, MD; Sanjeevikumar Meenakishundaram, MD; Santhosh Subramonian, MD; Simon Leach, MD; Sissi Ispoglou, MD; Sreeman Andole, MD; Timothy England, MD; Aravindakshan Manoj, MD; Frances Harrington, MD; Habib Rehman, MD; Jane Sword, MD; Julie Staals, MD; Karim Mahawish, MD; Kirsty Harkness, MD; Louise Shaw, MD; Michael McCormich, MD; Nikola Sprigg, MD; Syed Mansoor, MD; Vinodh Krishnamurthy, MD

#### **E. NOACISP-LONGTERM**

Stefan T Engelter, Philippe A Lyrer, Leo H Bonati, David J Seiffge , Christopher Traenka, Alexandros A Polymeris , Annaelle Zietz, Nils Peters, Gian Marco De Marchis, Sebastian Thilemann, Nikolaos S Avramiotis, Henrik Gensicke, Lisa Hert, Benjamin Wagner, Fabian Schaub, Louisa Meya, Joachim Fladt, Tolga Dittrich, Urs Fisch

#### **F. Verona registry**

Bruno Bonetti, MD, PhD; Paolo Bovi, MD; Giampaolo Tomelleri, MD; Nicola Micheletti, MD; Cecilia Zivelonghi, MD; Andrea Emiliani, MD.

#### **G. Erlangen registry**

Bernd Kallmünzer, Kosmas Macha, Gabriela Siedler, Svenja Stoll, Ruihao Wang, Bastian Volbers, Stefan Schwab, David Haupenthal, Luise Gaßmann

**Table II. Inclusion and exclusion criteria for the included studies**

**A. SAMURAI**

---

**Inclusion criterion:**

Patients who were hospitalized (or initiated acute management at the outpatient clinic) within 7 days after onset of acute ischemic stroke (AIS) or transient ischemic attack (TIA) and were diagnosed as having nonvalvular atrial fibrillation (NVAF)

---

**Exclusion criteria:**

1. Rheumatic mitral valve disease
  2. A history of prosthetic valve replacement or mitral valve surgical repair
  3. Active infective endocarditis
  4. Patient, family member or legally responsible person does not have given informed consent
  5. Inappropriate patient's conditions for study enrollment in the opinion of the investigator
- 

**B. RELAXED**

---

**Inclusion criterion:**

Patients with NVAF complicated with AIS or TIA who fulfill the following criteria

1. Hospitalized or visited the hospital as outpatients within 48 hours of the onset of AIS or TIA
  2. Having an infarct (a symptom in those with TIA) in the middle cerebral artery area
  3. Treated with rivaroxaban within 30 days of the onset of AIS or TIA
  4. Those who or those whose family or other representatives agree to participate in the study
- 

**Exclusion criteria:**

1. Hypersensitivity to rivaroxaban
  2. Clinically significant hemorrhage, including gastrointestinal hemorrhage
  3. Liver disease with a coagulation disorder
  4. A moderate or severe liver disorder (Child-Pugh Class B or C)
  5. Renal failure (creatinine clearance: <15 mL/minute)
  6. Poorly controlled hypertension (> 180/100 mmHg)
  7. Women who are or are likely to be pregnant
  8. Treated with HIV protease inhibitors including ritonavir, atazanavir, and indinavir
  9. Treated with an oral or injectable formulation of azole antifungal drugs, including itraconazole, voriconazole, and ketoconazole, and excluding fluconazole
  10. Acute bacterial endocarditis
-

- 
11. Anticoagulation is initiated with dabigatran, apixaban, or edoxaban and is substituted by rivaroxaban.
  12. The investigator in charge judges not eligible for the study
- 

### **C. RAF**

---

**Inclusion criterion:**

Patients with AIS and known or newly diagnosed atrial fibrillation (NVAf).

---

**Exclusion criteria:**

Contraindications to anticoagulation.

---

### **D. RAF-NOAC**

---

**Inclusion criterion:**

Patients with AIS and known or newly diagnosed AF.

---

**Exclusion criteria:**

1. Contraindications to anticoagulation with direct oral anticoagulants (DOACs).
  2. High risk of bleeding, defined as clinically significant liver disease (acute or chronic hepatitis, cirrhosis, or alanine aminotransferase level >3 times the upper limit of normal), creatinine clearance <30 mL/min (for apixaban, the threshold was 25 mL/min)
  3. Life expectancy of <3 to 6 months, 3) use of interacting medications
  4. Uncontrolled hypertension.
- 

### **E. CROMIS-2**

---

**Inclusion criterion:**

Adults (ie, ≥18 years of age) with electrocardiogram-confirmed NVAf who presented to participating hospitals with AIS or TIA and were identified by their treating physician for anticoagulation treatment.

---

**Exclusion criteria:**

1. Could not undergo MRI
  2. Definite contraindication to anticoagulation
  3. Previously received therapeutic anticoagulation
-

## **F. Single-center study from Basel**

---

### **Inclusion criterion:**

1. At least 18 years old
2. Hospitalization between April 2013 and September 2015 for AIS or TIA
3. Diagnosis of NVAf, either preexisting or in-hospital
4. Oral anticoagulation with DOAC or vitamin K antagonists continued (for those already on anticoagulation) or started or restarted within 6 months after the index event.

---

### **Exclusion criteria:**

Patients with mechanical heart valves and those in whom anticoagulation was started more than 6 months after the index event.

---

## **G. Single-center study from Verona**

---

### **Inclusion criterion:**

DOAC-naïve patients who had infarct with or without asymptomatic HT classified according to European Cooperative Acute Stroke Study (ECASS) on pre-DOAC CT scan, and started DOAC within 7 days after stroke onset.

---

### **Exclusion criteria:**

Started DOAC after 8 days of stroke onset.

---

## **H. Single-center study from Erlangen**

---

### **Inclusion criterion:**

1. AF-associated acute ischemic event
2. Treatment with DOACs during in-patient hospital stay.

---

### **Exclusion criteria:**

1. Received several different anticoagulation regimens
  2. Early cessation of DOAC therapy for other reasons than intracranial hemorrhage.
-

**Table III. Baseline characteristics of patients in each subgroup of the derivation cohort by stroke severity**

|                                                        | TIA        | Ischemic stroke |                  |                | P      |
|--------------------------------------------------------|------------|-----------------|------------------|----------------|--------|
|                                                        | (n=67)     | Minor (n=899)   | Moderate (n=370) | Severe (n=461) |        |
| Age, y                                                 | 72 [65–80] | 76 [70–82]      | 77 [69–84]       | 80 [73–86]     | 0.005  |
| Women                                                  | 23 (34)    | 326 (36)        | 152 (41)         | 229 (50)       | <0.001 |
| Premorbid modified Rankin Scale score                  | 0 [0–0]    | 0 [0–0]         | 0 [0–1]          | 0 [0–2]        | <0.001 |
| Hypertension                                           | 41 (61)    | 605 (67)        | 256 (69)         | 310 (67)       | 0.632  |
| Diabetes mellitus                                      | 12 (18)    | 166 (18)        | 58 (16)          | 73 (16)        | 0.524  |
| Dyslipidemia                                           | 27 (40)    | 292 (32)        | 98 (26)          | 130 (28)       | 0.034  |
| History of acute coronary syndrome                     | 1 (1)      | 61 (7)          | 30 (8)           | 33 (7)         | 0.270  |
| History of stroke/TIA before index event               | 16 (24)    | 180 (20)        | 59 (16)          | 80 (17)        | 0.202  |
| Premorbid oral anticoagulation                         | 13 (19)    | 188 (21)        | 68 (18)          | 108 (23)       | 0.351  |
| Premorbid oral antiplatelet use                        | 15 (22)    | 179 (20)        | 82 (22)          | 88 (19)        | 0.688  |
| Paroxysmal AF                                          | 39 (58)    | 380 (42)        | 155 (42)         | 174 (38)       | 0.014  |
| AF documented before index event                       | 38 (57)    | 458 (51)        | 172 (46)         | 224 (49)       | 0.304  |
| CHADS2 score                                           | 2 [1–2]    | 2 [1–3]         | 2 [1–2]          | 2 [1–3]        | 0.028  |
| CHADS2-VASc score                                      | 3 [2–4]    | 3 [2–4]         | 3 [2–4]          | 4 [3–4]        | <0.001 |
| HAS-BLED score                                         | 2 [1–3]    | 2 [1–3]         | 2 [1–2]          | 2 [1–3]        | 0.315  |
| NIHSS score at admission                               | 0 [0–2]    | 3 [1–5]         | 12 [9–14]        | 20 [18–24]     | <0.001 |
| Small infarct                                          | 67 (100)   | 317 (35)        | 34 (9)           | 28 (6)         | <0.001 |
| Infarct only in the vertebrobasilar arterial territory | 2 (3)      | 76 (8)          | 6 (2)            | 7 (2)          | <0.001 |
| Hemorrhagic transformation                             | 0 (0)      | 58 (6)          | 37 (10)          | 58 (13)        | <0.001 |
| intravenous thrombolysis                               | 1 (1)      | 114 (13)        | 140 (38)         | 193 (42)       | <0.001 |
| Mechanical thrombectomy                                | 0 (0)      | 18 (2)          | 69 (19)          | 147 (32)       | <0.001 |
| Antiplatelet therapy after index event                 | 9 (13)     | 171 (19)        | 45 (12)          | 35 (8)         | <0.001 |
| Days from onset to DOAC initiation, d                  | 2 [1–5]    | 3 [2–7]         | 4 [2–7]          | 5 [2–9]        | <0.001 |
| Type of DOACs at initiation                            |            |                 |                  |                | <0.001 |
| Dabigatran                                             | 11 (16)    | 144 (16)        | 32 (9)           | 24 (5)         |        |
| Rivaroxaban                                            | 55 (82)    | 741 (82)        | 332 (90)         | 433 (94)       |        |
| Apixaban                                               | 1 (1)      | 14 (2)          | 6 (2)            | 4 (1)          |        |

N (%) or median [interquartile range].

AF indicates atrial fibrillation; DOAC, direct oral anticoagulant; NIHSS, National Institutes of Health Stroke Scale; TIA, transient ischemic attack.



**Table IV. Outcomes in four subgroups of the derivation cohort by neurological severity**

|                                  | Early Group | Late Group | <i>P</i> |
|----------------------------------|-------------|------------|----------|
| <b>Transient ischemic attack</b> | n=26        | n=41       |          |
| Stroke / systemic embolism       | 0           | 1 (2.4)    | 0.422    |
| Ischemic stroke                  | 0           | 1 (2.4)    | 0.422    |
| Death                            | 0           | 0          | -        |
| Major bleeding                   | 0           | 1 (2.4)    | 0.422    |
| Intracranial hemorrhage          | 0           | 0          | -        |
| <b>Mild ischemic stroke</b>      | n=369       | n=530      |          |
| Stroke / systemic embolism       | 10 (2.7)    | 23 (4.3)   | 0.201    |
| Ischemic stroke                  | 10 (2.7)    | 19 (3.6)   | 0.465    |
| Death                            | 4 (1.1)     | 2 (0.4)    | 0.201    |
| Major bleeding                   | 0           | 5 (0.9)    | 0.061    |
| Intracranial hemorrhage          | 0           | 3 (0.6)    | 0.148    |
| <b>Moderate ischemic stroke</b>  | n=169       | n=201      |          |
| Stroke / systemic embolism       | 1 (0.6)     | 4 (2.0)    | 0.246    |
| Ischemic stroke                  | 0           | 3 (1.5)    | 0.111    |
| Death                            | 1 (0.6)     | 4 (2.0)    | 0.246    |
| Major bleeding                   | 3 (1.8)     | 1 (0.5)    | 0.237    |
| Intracranial hemorrhage          | 1 (0.6)     | 0          | 0.275    |
| <b>Severe ischemic stroke</b>    | n=221       | n=240      |          |
| Stroke / systemic embolism       | 4 (1.8)     | 11 (4.6)   | 0.094    |
| Ischemic stroke                  | 3 (1.4)     | 9 (3.8)    | 0.107    |
| Death                            | 10 (4.5)    | 9 (3.8)    | 0.518    |
| Major bleeding                   | 3 (1.4)     | 3 (1.3)    | 0.919    |
| Intracranial hemorrhage          | 1 (0.5)     | 1 (0.4)    | 0.953    |

**Table V. Baseline characteristics of patients in the validation cohort**

|                                          | Total<br>(n=2036) | Early Group<br>(n=547) | Late Group<br>(n=1489) | P      |
|------------------------------------------|-------------------|------------------------|------------------------|--------|
| Age, y                                   | 78 [71–84]        | 79 [73–85]             | 78 [71–84]             | 0.005  |
| Women                                    | 1039 (51)         | 283 (52)               | 756 (51)               | 0.700  |
| Hypertension, n (%)                      | 1566 (77)         | 424 (78)               | 1142 (77)              | 0.688  |
| Diabetes mellitus                        | 432 (21)          | 103 (19)               | 329 (22)               | 0.110  |
| Dyslipidemia                             | 499 (41)          | 155 (39)               | 344 (42)               | 0.293  |
| History of stroke/TIA before index event | 483 (24)          | 141 (26)               | 342 (23)               | 0.187  |
| Premorbid oral anticoagulation           | 414 (20)          | 153 (28)               | 261 (18)               | <0.001 |
| Concomitant oral antiplatelet use        | 633 (40)          | 134 (37)               | 499 (40)               | 0.331  |
| Paroxysmal AF                            | 273 (13)          | 83 (15)                | 190 (13)               | 0.157  |
| AF documented before index event         | 730 (36)          | 286 (52)               | 444 (30)               | <0.001 |
| CHADS2-VASc score                        | 5 [4–6]           | 5 [4–6]*               | 5 [4–6]*               | 0.004  |
| HAS-BLED score                           | 3 [2–4]           | 3 [2–3]                | 3 [2–4]                | 0.017  |
| NIHSS score at admission                 | 5 [2–10]          | 4 [2–10]               | 5 [2–10]               | <0.001 |
| Days from onset to DOAC initiation, d    | 6 [3–12]          | 2 [1–2]                | 8 [5–14]               | <0.001 |
| Intravenous thrombolysis                 | 518 (26)          | 160 (29)               | 358 (24)               | 0.016  |
| Type of DOACs at initiation              |                   |                        |                        | 0.006  |
| Dabigatran                               | 654 (32)          | 154 (28)               | 500 (34)               |        |
| Rivaroxaban                              | 514 (25)          | 145 (27)               | 369 (25)               |        |
| Apixaban                                 | 533 (26)          | 161 (29)               | 372 (25)               |        |
| Edoxaban                                 | 11 (1)            | 7 (1)                  | 4 (0)                  |        |
| Unknown                                  | 324 (16)          | 80 (15)                | 244 (16)               |        |

N (%) or median [interquartile range].

\* Mean ± standard deviation: 5.1±1.4 (Early) versus 4.9±1.6 (Late)

2 patients (1 in Early Group and 1 in Late Group) are missing data for age; 7 (2 and 5, respectively) for hypertension; 4 (1 and 3, respectively) for diabetes mellitus; 812 (146 and 666, respectively) for dyslipidemia; 435 (188 and 247, respectively) for concomitant oral antiplatelet use; 8 (1 and 7, respectively) for CHADS-VASc score; 1092 (235 and 857, respectively) for HAS-BLED score; and 12 (4 and 8, respectively) for intravenous thrombolysis.

AF indicates atrial fibrillation; DOAC, direct oral anticoagulant; NIHSS, National Institutes of Health Stroke Scale; TIA, transient ischemic attack.

**Table VI. Outcomes in four subgroups of the validation cohort by neurological severity**

|                                  | Early Group | Late Group | <i>P</i> |
|----------------------------------|-------------|------------|----------|
| <b>Transient ischemic attack</b> | n=27        | n=43       |          |
| Ischemic stroke                  | 0 (0)       | 0 (0)      | -        |
| Death                            | 0 (0)       | 2 (4.7)    | 0.256    |
| Intracranial hemorrhage          | 0 (0)       | 1 (2.3)    | 0.425    |
| <b>Mild ischemic stroke</b>      | n=337       | n=903      |          |
| Ischemic stroke                  | 9 (2.7)     | 19 (2.1)   | 0.550    |
| Death                            | 5 (1.5)     | 10 (1.1)   | 0.590    |
| Intracranial hemorrhage          | 1 (0.3)     | 2 (0.2)    | 0.922    |
| <b>Moderate ischemic stroke</b>  | n=117       | n=357      |          |
| Ischemic stroke                  | 2 (1.7)     | 6 (1.7)    | 0.983    |
| Death                            | 3 (2.6)     | 8 (2.2)    | 0.840    |
| Intracranial hemorrhage          | 0 (0)       | 4 (1.1)    | 0.250    |
| <b>Severe ischemic stroke</b>    | n=66        | n=186      |          |
| Ischemic stroke                  | 2 (3.0)     | 8 (4.3)    | 0.650    |
| Death                            | 4 (6.1)     | 12 (6.5)   | 0.911    |
| Intracranial hemorrhage          | 0 (0)       | 2 (1.1)    | 0.398    |

Figure I. Scatter plots of age and the National Institutes of Health Stroke Scale scores

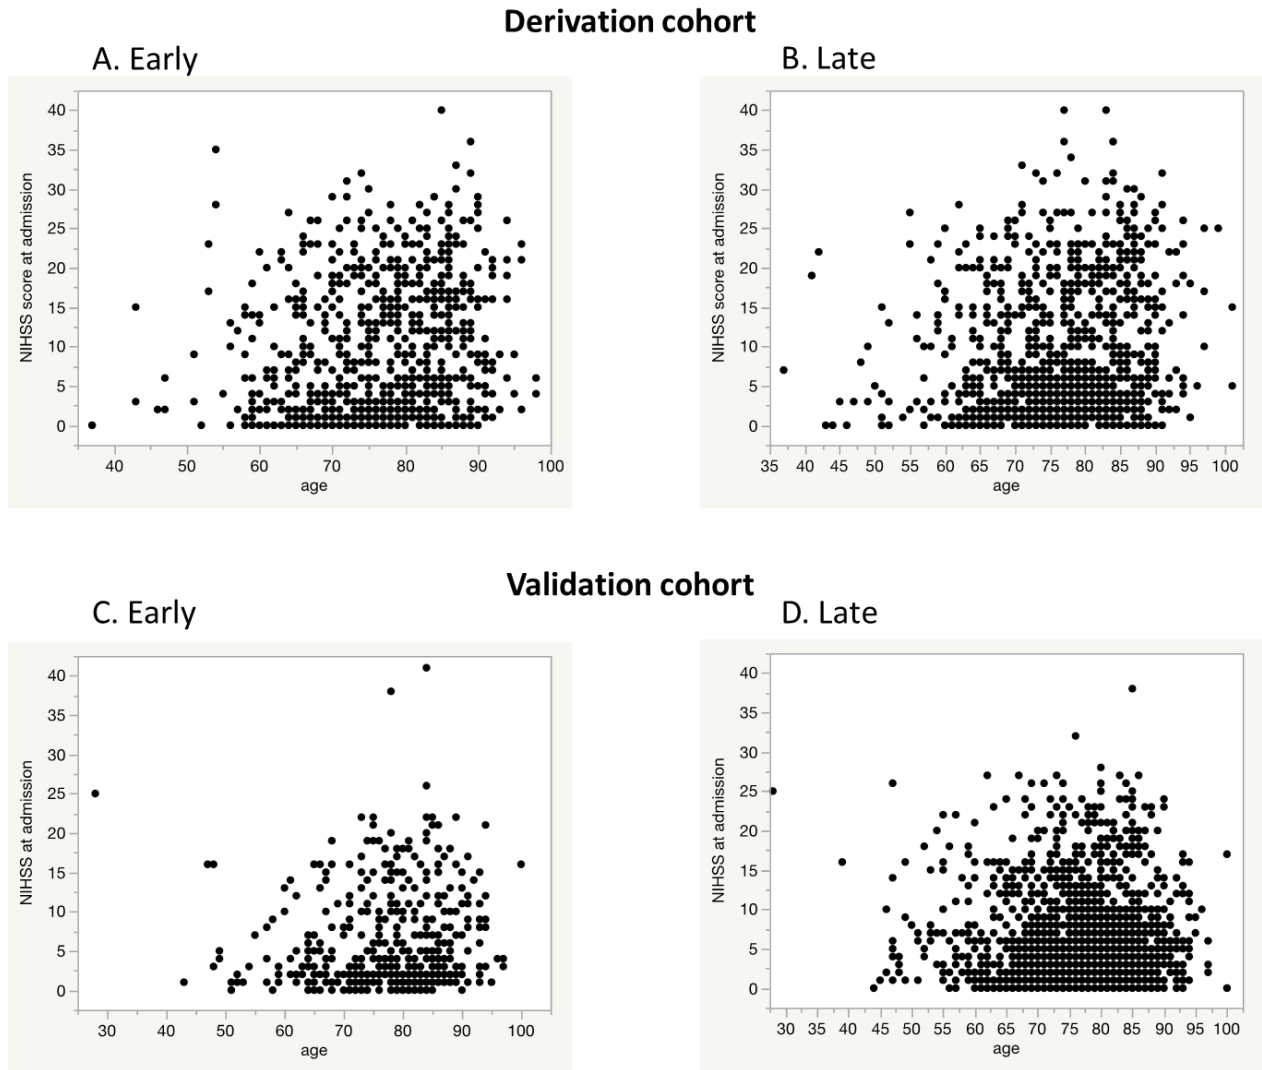

Supplement: str-53-1540-s001.pdf [file str-53-1540-s001.pdf]
